# Supplementary material for: Current use of extracorporeal life support in airway surgery: a narrative review
Source: PubMed Central journal article supplement — J Thorac Dis. 2023 Mar 7;15(7):4101–10. doi: 10.21037/jtd-22-1483 (PMC10407487; doi:10.21037/jtd-22-1483), 2023-03-07
Supplement: jtd-15-07-4101-rc.pdf [file jtd-15-07-4101-rc.pdf]

## Narrative Review Checklist

| Section/Topic              | Item No | Item                                                                                                                                                                               | Reported on Page Number/Line Number | Reported on Section/Paragraph            |
|----------------------------|---------|------------------------------------------------------------------------------------------------------------------------------------------------------------------------------------|-------------------------------------|------------------------------------------|
| <b>TITLE</b>               |         |                                                                                                                                                                                    |                                     |                                          |
| Title                      | 1       | Identify the report as a Narrative Review or Literature Review.                                                                                                                    | 3/55                                | Introduction                             |
| <b>ABSTRACT</b>            |         |                                                                                                                                                                                    |                                     |                                          |
| Structured summary         | 2       | Provide a structured summary with the subsections as: Background and Objective, Methods, Key Content and Findings, Conclusions.                                                    | 2/18-37                             | Abstract                                 |
| <b>INTRODUCTION</b>        |         |                                                                                                                                                                                    |                                     |                                          |
| Rationale/background       | 3       | Describe the rationale for the review in the context of what is already known.                                                                                                     | 3/38-58                             | Introduction                             |
| Objectives                 | 4       | Specify the key question(s) identified for the review topic.                                                                                                                       | 3/55-57                             | Introduction                             |
| <b>METHODS</b>             |         |                                                                                                                                                                                    |                                     |                                          |
| Research selection         | 5       | Specify the process for identifying the literature search (eg, years considered, language, publication status, study design, and databases of coverage).                           | 3/59-72                             | Methods                                  |
| <b>DISCUSSION/ SUMMARY</b> |         |                                                                                                                                                                                    |                                     |                                          |
| Narrative                  | 6       | Discuss: 1) research reviewed including fundamental or key findings, 2) limitations and/or quality of research reviewed, and 3) need for future research.                          | 7/192-209                           | Planning considerations-current practice |
| Summary                    | 7       | Provide an overall interpretation of the narrative review in the context of clinical practice for health professionals, policy development and implementation, or future research. | 6/152-202                           | Planning considerations-current practice |

Article information: <https://dx.doi.org/10.21037/jtd-22-1483>

\*As the checklist was provided upon initial submission, the page number/line number reported may be changed due to copyediting and may not be referable in the published version. In this case, the section/paragraph may be used as an alternative reference.
